# Supplementary material for: Prevalence and Correlates of Smoking and Cessation-Related Behavior among Survivors of Ten Cancers: Findings from a Nationwide Survey Nine Years after Diagnosis
Source: Oxford University Press journal article supplement (doi:10.1158/1055-9965.epi-14-0046), 2014-08-06
Supplement: 10559965epi140046-sup-125563_2_supp_0_n6rgdb.docx [file 10559965epi140046-sup-125563_2_supp_0_n6rgdb.docx]

Supplementary Table 1. Relationships of sociodemographic, cancer- and other health-related variables with having quit smoking after diagnosis versus current smoking.

|  | Total  N=409 | | **Quit after Diagnosis** | | **Currently Smoke** | |  |  |
| --- | --- | --- | --- | --- | --- | --- | --- | --- |
| n = 137  (33.5%) | | n = 272  (66.5%) | |  |
|  | N(%)/M(SD) | | n(%)/M(SD) | | n(%)/M(SD) | | *χ2/t test* | *P* value |
| **Sociodemographic variables** |  |  |  |  |  |  |  |  |
| *Race* |  |  |  |  |  |  |  |  |
| Caucasian/White | 372 | (91.0) | 123 | (33.1) | 249 | (66.9) | *χ*2(2,409)=3.0 | .221 |
| African American/Black | 31 | (7.6) | 10 | (32.3) | 21 | (67.7) |  |  |
| Other | 6 | (1.5) | 4 | (66.7) | 2 | (33.3) |  |  |
| *Gender* |  |  |  |  |  |  |  |  |
| Male | 178 | (43.5) | 67 | (37.6) | 111 | (62.4) | *χ*2(1,409)=2.4 | .119 |
| Female | 231 | (56.5) | 70 | (30.3) | 161 | (69.7) |  |  |
| *Education* |  |  |  |  |  |  |  |  |
| High school or less | 165 | (40.3) | 53 | (32.1) | 112 | (67.9) | *χ*2(1,404)=0.4 | .593 |
| Post-secondary | 239 | (58.4) | 84 | (35.1) | 155 | (64.9) |  |  |
| *Marital status* |  |  |  |  |  |  |  |  |
| Not married | 136 | (33.3) | 41 | (30.1) | 95 | (69.9) | *χ*2(1,409)=1.0 | .320 |
| Married | 273 | (66.7) | 96 | (35.2) | 177 | (64.8) |  |  |
| *Income* |  |  |  |  |  |  |  |  |
| Less than $19,999 | 76 | (18.6) | 20 | (26.3) | 56 | (73.7) | *χ*2(3,359)=4.7 | .194 |
| $20,000 to $39,999 | 87 | (21.3) | 29 | (33.3) | 58 | (66.7) |  |  |
| $40,000 to $74,999 | 114 | (27.9) | 34 | (29.8) | 80 | (70.2) |  |  |
| $75,000 or more | 82 | (20.0) | 34 | (41.5) | 48 | (58.5) |  |  |
| *Age* | 62.4 | (9.6) | 63.5 | (11.0) | 61.8 | (8.8) | *t*(409)=1.59 | .113 |
| **Cancer-related variables** |  |  |  |  |  |  |  |  |
| *SEER stage* |  |  |  |  |  |  |  |  |
| In Situ | 21 | (5.1) | 7 | (33.5) | 14 | (66.7) | *χ*2(3,409)=0.3 | .967 |
| Localized | 260 | (63.6) | 87 | (33.5) | 173 | (66.5) |  |  |
| Regional | 104 | (25.4) | 36 | (34.6) | 68 | (65.4) |  |  |
| Distant | 24 | (5.9) | 7 | (29.2) | 17 | (70.8) |  |  |
| *Cancer recurrence in past 5 yrs* |  |  |  |  |  |  |  |  |
| Yes | 43 | (10.5) | 15 | (34.9) | 28 | (65.1) | *χ*2(1,409)=0.0 | .839 |
| No | 366 | (89.5) | 122 | (33.3) | 244 | (66.7) |  |  |
| *Cancer metastasized in past 5 yrs* |  |  |  |  |  |  |  |  |
| Yes | 18 | (4.4) | 4 | (22.2) | 14 | (77.8) | *χ*2(1,409)=0.3 | .300 |
| No | 391 | (95.6) | 133 | (34.0) | 258 | (66.0) |  |  |
| *New cancer Dx in past 5 yrs* |  |  |  |  |  |  |  |  |
| Yes | 33 | (8.1) | 12 | (36.4) | 21 | (63.6) | *χ*2(1,409)=0.1 | .716 |
| No | 376 | (91.9) | 125 | (33.2) | 251 | (66.8) |  |  |
| *Cancer treatment in past 5 yrs* |  |  |  |  |  |  |  |  |
| Yes | 90 | (22.0) | 35 | (38.9) | 55 | (61.1) | *χ*2(1,409)=1.5 | .220 |
| No | 319 | (78.0) | 102 | (32.0) | 217 | (68.0) |  |  |
| *Cancer smoking related* |  |  |  |  |  |  |  |  |
| Yes | 141 | (34.5) | 59 | (41.8) | 82 | (58.2) | *χ*2(1,409)=6.73 | .009 |
| No | 268 | (65.5) | 78 | (29.1) | 190 | (70.9) |  |  |
| *Years since diagnosis* | 9.0 | (0.7) | 9.0 | (0.6) | 9.0 | (0.7) | *t*(407)=1.0 | .316 |
| **Other health-related variables** |  |  |  |  |  |  |  |  |
| *Mental health treatment in past 5 yrs* |  |  |  |  |  |  |  |  |
| Yes | 126 | (30.8) | 42 | (33.3) | 84 | (66.7) | *χ*2(1,409)=0.0 | .963 |
| No | 283 | (58.2) | 95 | (33.6) | 188 | (66.4) |  |  |
| *Alcohol frequency* |  |  |  |  |  |  |  |  |
| 1 day/week or less | 126 | (30.8) | 41 | (32.5) | 85 | (67.5) | *χ*2(1,405)=0.1 | .820 |
| 2 days/week or more | 279 | (68.2) | 94 | (33.7) | 185 | (66.3) |  |  |
| *Alcohol quantity* |  |  |  |  |  |  |  |  |
| None | 143 | (35.0) | 50 | (35.0) | 93 | (65.0) | *χ*2(2,403)=0.6 | .739 |
| 1 drink/day | 103 | (25.2) | 36 | (35.0) | 67 | 65.0) |  |  |
| 2 or more drinks/day | 157 | (38.4) | 49 | (31.2) | 108 | (68.8) |  |  |
| *Physical functioning* | 43.8 | (11.4) | 43.6 | (11.0) | 43.9 | (11.6) | *t*(407)=0.2 | .820 |
| *Comorbid conditions* | 2.6 | (2.2) | 3.0 | (2.3) | 2.4 | (2.1) | *t*(407)=2.6 | .009 |
| *Body mass index* | 28.0 | (5.8) | 29.6 | (6.2) | 27.3 | (5.5) | *t*(400)=3.6 | .000 |

*Notes:*

Subtotals may not equal actual totals due to exclusion of respondents missing data on a particular characteristic.

Supplementary Table 2. Prevalence of intentions to quit in relationship to sociodemographic, cancer, and other health-related variables among current smokers.

|  |  | | **Intentions of quitting** | | | |  |  |
| --- | --- | --- | --- | --- | --- | --- | --- | --- |
|  | Total  N=268 | | **No or Not sure** | | **Yes** | |  |  |
| n = 143  (54.4%) | | n = 125  (46.6%) | |  |
|  | N(%)/M(SD) | | n(%)/M(SD) | | n(%)/M(SD) | | *χ2/t test* | *P* value |
| **Sociodemographic variables** |  |  |  |  |  |  |  |  |
| *Race* |  |  |  |  |  |  |  |  |
| Caucasian/White | 245 | (91.4) | 135 | (55.1) | 110 | (44.9) | *χ*2(2,268)=3.7 | .158 |
| African American/Black | 21 | (7.8) | 7 | (33.3) | 14 | (66.7) |  |  |
| Other | 2 | (0.7) | 1 | (0.7) | 1 | (0.9) |  |  |
| *Gender* |  |  |  |  |  |  |  |  |
| Male | 108 | (40.3) | 58 | (53.7) | 50 | (46.3) | *χ*2(1,268)=0.0 | .926 |
| Female | 160 | (59.7) | 85 | (53.1) | 75 | (46.9) |  |  |
| *Education* |  |  |  |  |  |  |  |  |
| High school or less | 110 | (41.8) | 55 | (50.0) | 55 | (50.0) | *χ*2(1,263)=1.0 | .319 |
| Post-secondary | 153 | (58.2) | 86 | (56.2) | 67 | (43.8) |  |  |
| *Marital status* |  |  |  |  |  |  |  |  |
| Not married | 95 | (35.4) | 42 | (44.2) | 53 | (55.8) | *χ*2(1,268)=4.9 | .026 |
| Married | 173 | (64.6) | 101 | (58.4) | 72 | (41.6) |  |  |
| *Income* |  |  |  |  |  |  |  |  |
| Less than $19,999 | 55 | (23.0) | 27 | (49.1) | 28 | (50.9) | *χ*2(3,239)=0.5 | .911 |
| $20,000 to $39,999 | 58 | (24.3) | 30 | (51.7) | 28 | (48.3) |  |  |
| $40,000 to $74,999 | 78 | (32.6) | 41 | (52.6) | 37 | (47.4) |  |  |
| $75,000 or more | 48 | (20.1) | 27 | (56.2) | 21 | (43.8) |  |  |
| *Age* | 61.8 | (8.8) | 63.1 | (9.5) | 60.3 | (7.8) | *t*(266)=2.6 | .009 |
| **Cancer-related variables** |  |  |  |  |  |  |  |  |
| *SEER stage* |  |  |  |  |  |  |  |  |
| In Situ | 14 | (5.2) | 8 | (57.1) | 6 | (42.9) | *χ*2(3,268)=4.3 | .236 |
| Localized | 169 | (63.1) | 92 | (54.4) | 77 | (45.6) |  |  |
| Regional | 68 | (25.4) | 38 | (55.9) | 30 | (44.1) |  |  |
| Distant | 17 | (6.3) | 5 | (29.4) | 12 | (70.6) |  |  |
| *Cancer recurrence in past 5 yrs* |  |  |  |  |  |  |  |  |
| Yes | 27 | (10.1) | 17 | (63.0) | 10 | (37.0) | *χ*2(1,268)=1.1 | .291 |
| No | 241 | (89.0) | 126 | (52.3) | 115 | (47.7) |  |  |
| *Cancer metastasized in past 5 yrs* |  |  |  |  |  |  |  |  |
| Yes | 13 | (4.9) | 9 | (69.2) | 4 | (30.8) | *χ*2(1,268)=1.4 | .241 |
| No | 255 | (95.1) | 134 | (52.5) | 121 | (47.5) |  |  |
| *New cancer Dx in past 5 yrs* |  |  |  |  |  |  |  |  |
| Yes | 21 | (7.8) | 13 | (61.9) | 8 | (38.1) | *χ*2(1,268)=0.7 | .413 |
| No | 247 | (92.2) | 130 | (52.6) | 117 | (47.4) |  |  |
| *Cancer treatment in past 5 yrs* |  |  |  |  |  |  |  |  |
| Yes | 54 | (20.1) | 33 | (61.1) | 21 | (38.9) | *χ*2(1,268)=1.6 | .201 |
| No | 214 | (79.9) | 110 | (51.4) | 104 | (48.6) |  |  |
| *Cancer smoking related* |  |  |  |  |  |  |  |  |
| Yes | 187 | (69.8) | 102 | (54.5) | 85 | (45.5) | *χ*2(1,268)=0.4 | .554 |
| No | 81 | (30.2) | 41 | (50.6) | 40 | (49.4) |  |  |
| *Years since diagnosis* | 9.0 | (0.7) | 9.0 | (0.7) | 9.0 | (0.7) | *t*(266)=0.3 | .769 |
| **Other health-related variables** |  |  |  |  |  |  |  |  |
| *Mental health treatment in past 5 yrs* |  |  |  |  |  |  |  |  |
| Yes | 84 | (31.3) | 41 | (48.8) | 43 | (51.2) | *χ*2(1,268)=1.0 | .313 |
| No | 184 | (68.7) | 102 | (55.4) | 82 | (44.6) |  |  |
| *Alcohol frequency* |  |  |  |  |  |  |  |  |
| 1 day/week or less | 183 | (68.3) | 90 | (49.2) | 93 | (50.8) | *χ*2(1,266)=4.2 | .041 |
| 2 days/week or more | 83 | (31.0) | 52 | (62.7) | 31 | (37.3) |  |  |
| *Alcohol quantity* |  |  |  |  |  |  |  |  |
| None | 91 | (34.0) | 45 | (49.5) | 46 | (50.5) | *χ*2(2,264)=0.9 | .651 |
| 1 drink/day | 67 | (25.0) | 38 | (56.7) | 29 | (43.3) |  |  |
| 2 or more drinks/day | 106 | (39.6) | 57 | (53.8) | 49 | (46.2) |  |  |
| *Cigarettes per day* | 12.7 | (8.7) | 13.9 | (8.9) | 11.2 | (8.3) | *t*(253)=2.5 | .012 |
| *Smoking Pattern* |  |  |  |  |  |  |  |  |
| Nondaily | 44 | (16.4) | 17 | (38.6) | 27 | (61.4) | *χ*2(1,268)=4.6 | .032 |
| Daily | 224 | (83.6) | 126 | (56.2) | 98 | (43.8) |  |  |
| *Physical functioning* | 43.8 | (11.6) | 44.4 | (11.2) | 43.1 | (12.1) | *t*(266)=0.9 | .350 |
| *Comorbid conditions* | 2.4 | (2.1) | 2.3 | (2.0) | 2.5 | (2.3) | *t*(266)=0.5 | .587 |
| *Body mass index* | 27.2 | (5.5) | 26.6 | (4.8) | 28.0 | (6.2) | *t*(261)=2.1 | .042 |

*Notes:*

Subtotals may not equal actual totals due to exclusion of respondents missing data on a particular characteristic.

Supplementary Table 3. Intentions of quitting within a month versus later in relationship to sociodemographic, cancer, and other health-related variables among current smokers.

|  |  | | **Intentions of Quitting** | | | |  |  |
| --- | --- | --- | --- | --- | --- | --- | --- | --- |
|  | Total  N=124 | | **In a month or less** | | **In next 3 months or later** | |  |  |
| n = 49  (39.5%) | | n = 75  (60.5%) | |  |
|  | N(%)/M(SD) | | n(%)/M(SD) | | n(%)/M(SD) | | *χ2/t test* | *P* value |
| **Sociodemographic variables** |  |  |  |  |  |  |  |  |
| *Race* |  |  |  |  |  |  |  |  |
| Caucasian/White | 109 | (87.9) | 44 | (40.4) | 65 | (59.6) | *χ*2(2,124)=2.3 | .322 |
| African American/Black | 14 | (11.3) | 4 | (28.6) | 10 | (71.4) |  |  |
| Other | 1 | (0.8) | 1 | (100.0) | 0 | (0.0) |  |  |
| *Gender* |  |  |  |  |  |  |  |  |
| Male | 50 | (40.3) | 23 | (46.0) | 27 | (54.0) | *χ*2(1,124)=1.5 | .225 |
| Female | 74 | (59.7) | 26 | (35.1) | 48 | (64.9) |  |  |
| *Education* |  |  |  |  |  |  |  |  |
| High school or less | 54 | (44.6) | 20 | (37.0) | 34 | (63.0) | *χ*2(1,121)=0.3 | .595 |
| Post-secondary | 67 | (55.4) | 28 | (41.8) | 39 | (58.2) |  |  |
| *Marital status* |  |  |  |  |  |  |  |  |
| Not married | 53 | (42.7) | 19 | (35.8) | 34 | (64.2) | *χ*2(1,124)=0.5 | .471 |
| Married | 71 | (57.3) | 30 | (42.3) | 41 | (57.7) |  |  |
| *Income* |  |  |  |  |  |  |  |  |
| Less than $19,999 | 28 | (24.8) | 10 | (35.7) | 18 | (50.9) | *χ*2(3,113)=2.1 | .560 |
| $20,000 to $39,999 | 27 | (23.9) | 8 | (29.6) | 19 | (70.4) |  |  |
| $40,000 to $74,999 | 37 | (32.7) | 16 | (43.2) | 21 | (56.8) |  |  |
| $75,000 or more | 21 | (18.6) | 10 | (47.6) | 11 | (52.4) |  |  |
| *Age* | 60.2 | (7.8) | 60.0 | (7.2) | 60.6 | (8.1) | *t*(122)=0.6 | .516 |
| **Cancer-related variables** |  |  |  |  |  |  |  |  |
| *SEER stage* |  |  |  |  |  |  |  |  |
| In Situ | 6 | (4.8) | 3 | (50.0) | 3 | (50.0) | *χ*2(3,124)=2.0 | .569 |
| Localized | 76 | (61.3) | 31 | (40.8) | 45 | (59.2) |  |  |
| Regional | 30 | (24.2) | 9 | (30.0) | 21 | (70.0) |  |  |
| Distant | 12 | (9.7) | 6 | (50.0) | 6 | (50.0) |  |  |
| *Cancer treatment in past 5 yrs* |  |  |  |  |  |  |  |  |
| Yes | 21 | (16.9) | 12 | (57.1) | 9 | (42.9) | *χ*2(1,124)=3.3 | .070 |
| No | 103 | (83.1) | 37 | (35.9) | 66 | (64.1) |  |  |
| *Cancer smoking related* |  |  |  |  |  |  |  |  |
| Yes | 39 | (31.5) | 21 | (53.8) | 18 | (46.2) | *χ*2(1,124)=4.9 | .027 |
| No | 85 | (68.5) | 28 | (32.9) | 57 | (67.1) |  |  |
| *Years since diagnosis*2 | 8.9 | (0.7) | 8.9 | (0.7) | 8.0 | (0.7) | *t*(122)=0.0 | .963 |
| **Other health-related variables** |  |  |  |  |  |  |  |  |
| *Mental health treatment in past 5 yrs* |  |  |  |  |  |  |  |  |
| Yes | 43 | (34.7) | 17 | (39.5) | 26 | (60.5) | *χ*2(1,124)=0.0 | .998 |
| No | 81 | (65.3) | 32 | (39.5) | 49 | (60.5) |  |  |
| *Alcohol frequency* |  |  |  |  |  |  |  |  |
| 1 day/week or less | 92 | (74.8) | 37 | (40.2) | 55 | (59.8) | *χ*2(1,123)=0.0 | .882 |
| 2 days/week or more | 31 | (25.2) | 12 | (38.7) | 19 | (61.3) |  |  |
| *Alcohol quantity* |  |  |  |  |  |  |  |  |
| None | 43 | (36.6) | 19 | (42.2) | 26 | (57.8) | *χ*2(2,123)=0.9 | .622 |
| 1 drink/day | 29 | (23.6) | 13 | (44.8) | 16 | (55.2) |  |  |
| 2 or more drinks/day | 49 | (39.8) | 17 | (34.7) | 32 | (65.3) |  |  |
| *Cigarettes per day* | 11.3 | (8.2) | 8.8 | (8.9) | 12.8 | (8.1) | *t*(112)=2.6 | .010 |
| *Smoking Pattern* |  |  |  |  |  |  |  |  |
| Nondaily | 26 | (21.0) | 18 | (69.2) | 8 | (30.8) | *χ*2(1,124)=12.2 | .001 |
| Daily | 98 | (79.0) | 31 | (31.6) | 67 | (68.4) |  |  |
| *Physical functioning* | 43.8 | (11.6) | 42.7 | (12.0) | 43.6 | (12.2) | *t*(122)=0.4 | .688 |
| *Comorbid conditions* | 2.5 | (2.3) | 2.3 | (2.2) | 2.6 | (2.4) | *t*(122)=0.6 | .549 |
| *Body mass index* | 28.0 | (6.2) | 27.2 | (5.7) | 28.5 | (6.5) | *t*(121)=1.2 | .236 |

*Notes:*

Subtotals may not equal actual totals due to exclusion of respondents missing data on a particular characteristic.
